# Supplementary figures and images for: Direct-acting Antivirals Improved the Quality of Life, Ameliorated Disease-related Symptoms, and Augmented Muscle Volume Three Years Later in Patients with Hepatitis C Virus
Source: PubMed Central journal article supplement — Intern Med. 2020 Nov 1;59(21):2653–60. doi: 10.2169/internalmedicine.5102-20 (PMC7691030; doi:10.2169/internalmedicine.5102-20), 2020-11-01

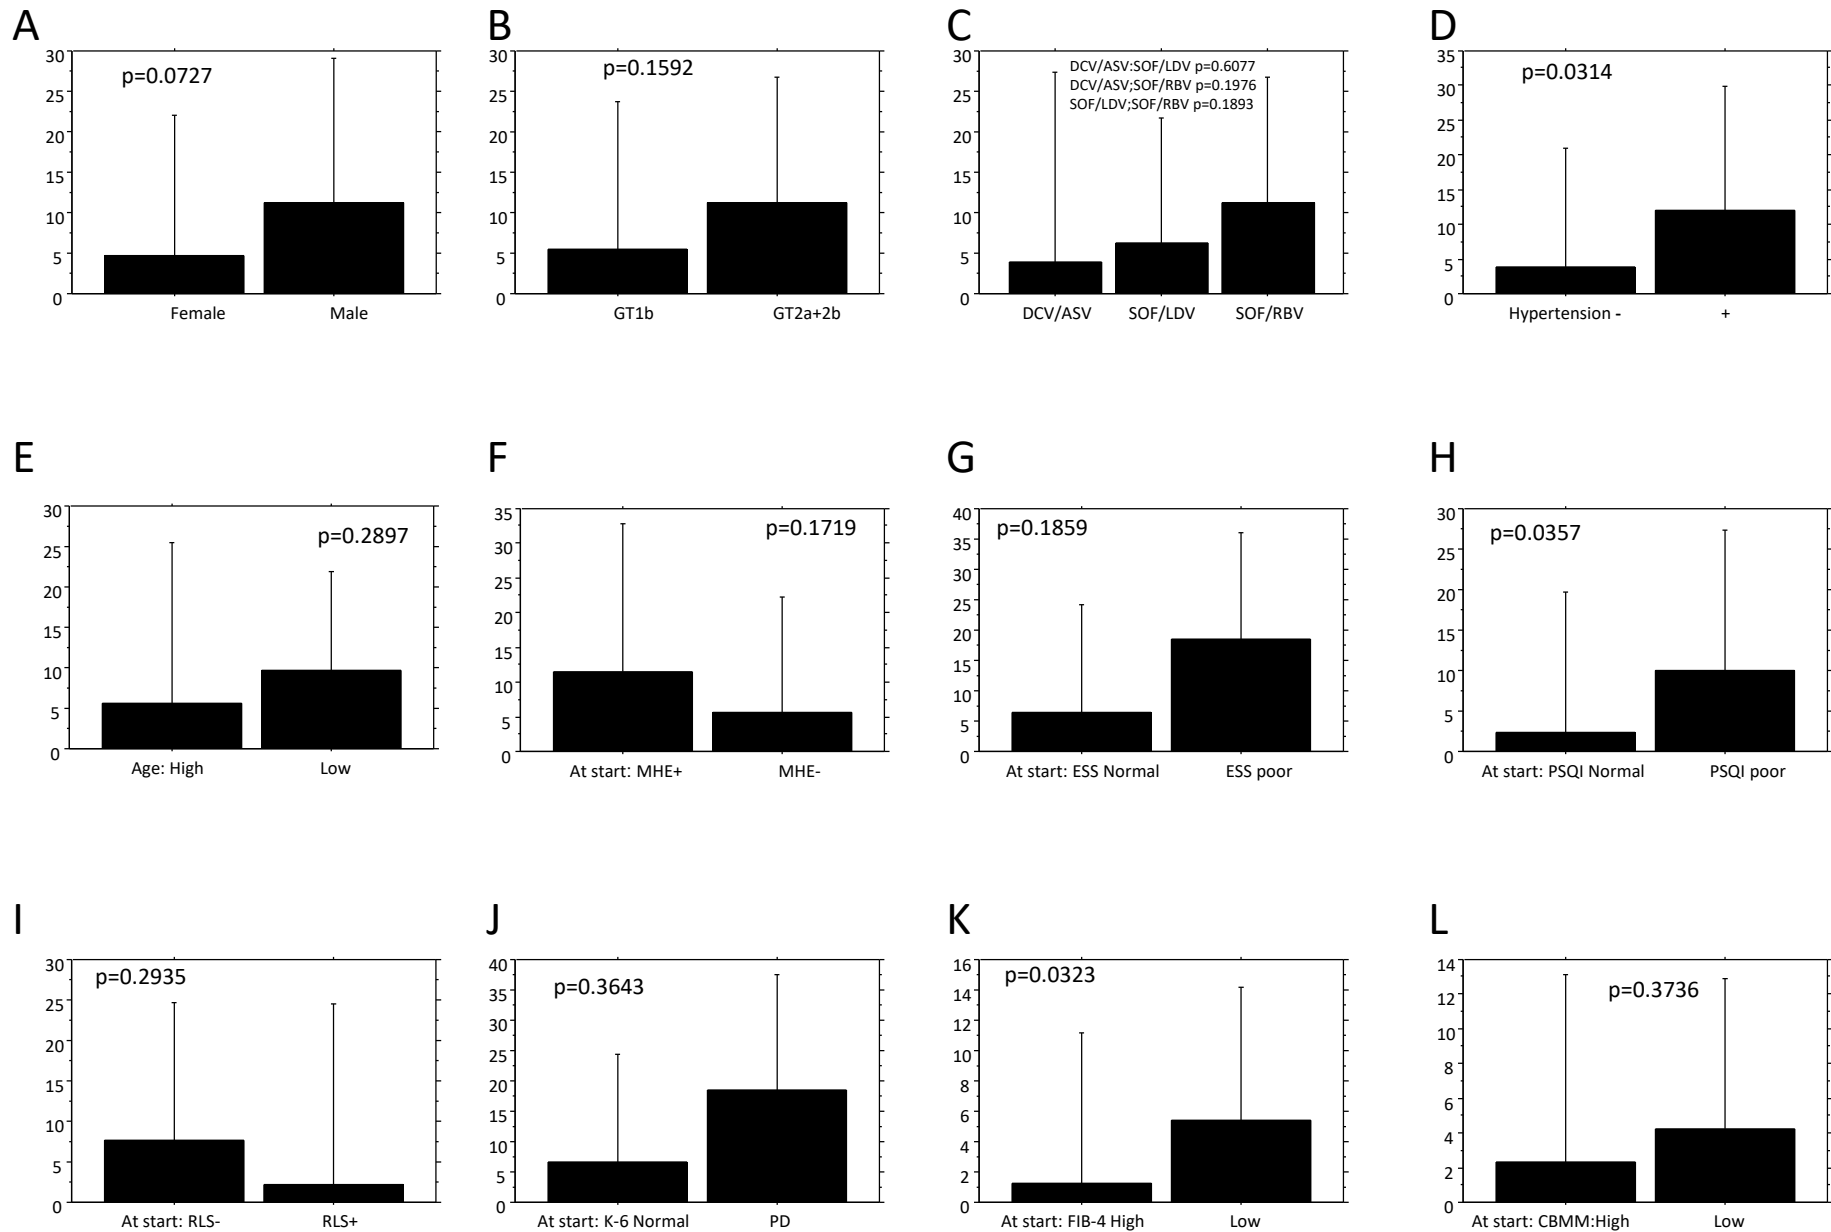

Supplemental Figure 1

Supplement: 1349-7235-59-2653-s001.pdf [file 1349-7235-59-2653-s001.pdf]

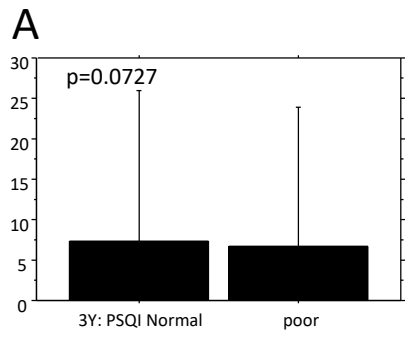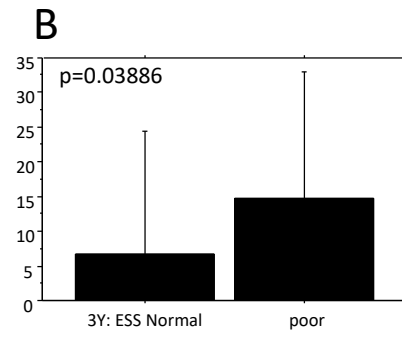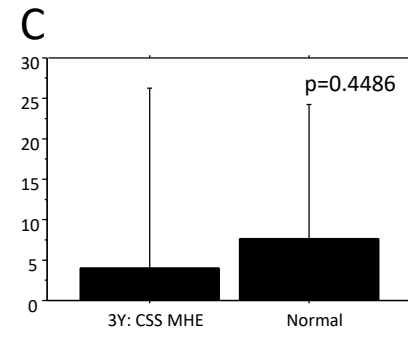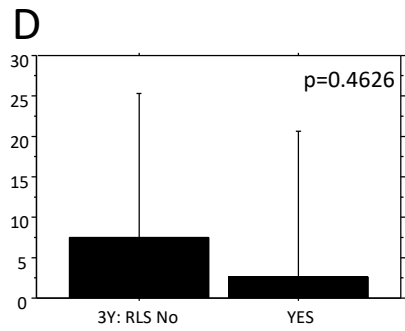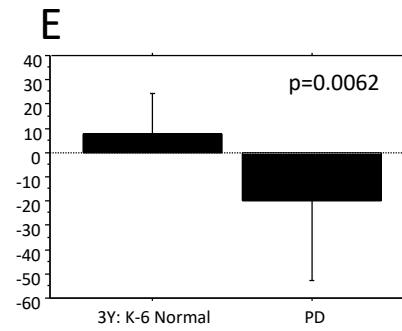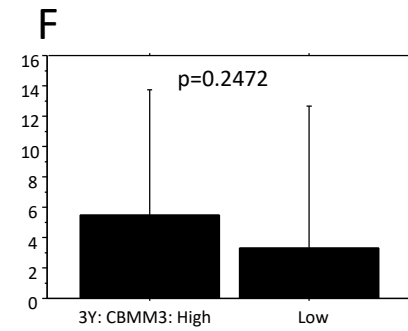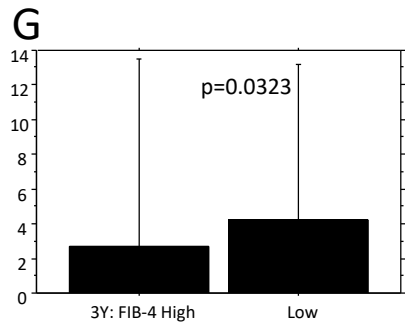

Supplement: 1349-7235-59-2653-s002.pdf [file 1349-7235-59-2653-s002.pdf]
